# Supplementary material
Source: MDPI journal article supplement (https://www.mdpi.com/2039-7283/12/2/21)
Supplement: s1 [file s1]

## Supplementary materials

|                       | <b>GSTp1</b> | <b>Iron</b> | <b>Zinc</b> | <b>CRP</b> | <b>Ferritin</b> | <b>SOD3</b> |
|-----------------------|--------------|-------------|-------------|------------|-----------------|-------------|
| <b>Number (n)</b>     | 29           | 29          | 29          | 29         | 29              | 29          |
| <b>Minimum</b>        | 2.666        | 13.00       | 235.3       | 1.860      | 16.80           | 0.0810      |
| <b>Maximum</b>        | 10.00        | 219.0       | 400.0       | 347.6      | 2881            | 5.550       |
| <b>Mean</b>           | 7.748        | 58.52       | 274.2       | 101.6      | 536.6           | 1.994       |
| <b>Std. Deviation</b> | 2.077        | 40.56       | 33.31       | 100.4      | 641.2           | 1.590       |
| <b>Std. Error</b>     | 0.3858       | 7.532       | 6.185       | 18.65      | 119.1           | 0.2953      |

| <b>Bonferroni's Multiple Comparison Test</b> | <b>Mean Diff.</b> | <b>t</b> | <b>P &lt; 0.05</b> | <b>Summary</b> | <b>95% CI of diff</b> |
|----------------------------------------------|-------------------|----------|--------------------|----------------|-----------------------|
| <b>GSTp1 vs SOD3</b>                         | 5.754             | 0.08243  | No                 | ns             | -202.1 to 213.6       |
| <b>GSTp1 vs Iron</b>                         | -50.77            | 0.7273   | No                 | ns             | -258.6 to 157.1       |
| <b>GSTp1 vs ZINC</b>                         | -266.4            | 3.816    | Yes                | **             | -474.3 to -58.54      |
| <b>GSTp1 vs CRP</b>                          | -93.86            | 1.345    | No                 | ns             | -301.7 to 114.0       |
| <b>GSTp1 vs Ferritin</b>                     | -528.9            | 7.576    | Yes                | ***            | -736.7 to -321.0      |
| <b>SOD3 vs Iron</b>                          | -56.52            | 0.8097   | No                 | ns             | -264.4 to 151.3       |
| <b>SOD3 vs ZINC</b>                          | -272.2            | 3.899    | Yes                | **             | -480.0 to -64.29      |
| <b>SOD3 vs CRP</b>                           | -99.61            | 1.427    | No                 | ns             | -307.5 to 108.3       |
| <b>SOD3 vs Ferritin</b>                      | -534.6            | 7.659    | Yes                | ***            | -742.5 to -326.8      |

Abbreviations: SOD3- Super oxide dismutase, GSTp1- Glutathione s transferase, CRP- C-Reactive Protein.

**Table S1: Column statistics and One-way ANOVA analysis of Diabetes mellitus as co-morbidity Vs anti oxidant and anti inflammatory parameters**

|                         | <b>GSTp1</b> | <b>Iron</b> | <b>Zinc</b> | <b>CRP</b> | <b>Ferritin</b> | <b>SOD3</b> |
|-------------------------|--------------|-------------|-------------|------------|-----------------|-------------|
| <b>Number of values</b> | 11           | 11          | 11          | 11         | 11              | 11          |
| <b>Minimum</b>          | 4.258        | 15.00       | 225.0       | 5.000      | 38.50           | 0.0640      |
| <b>Maximum</b>          | 10.00        | 445.0       | 331.0       | 156.0      | 940.0           | 2.630       |
| <b>Mean</b>             | 7.727        | 89.00       | 264.8       | 50.32      | 310.0           | 0.9700      |
| <b>Std. Deviation</b>   | 1.692        | 121.0       | 27.21       | 42.62      | 276.5           | 0.8256      |
| <b>Std. Error</b>       | 0.5103       | 36.49       | 8.205       | 12.85      | 83.36           | 0.2489      |

| <b>Bonferroni's Multiple Comparison Test</b> | <b>Mean Diff.</b> | <b>t</b> | <b>P &lt; 0.05</b> | <b>Summary</b> | <b>95% CI of diff</b> |
|----------------------------------------------|-------------------|----------|--------------------|----------------|-----------------------|
| <b>SOD3 vs GSTp1</b>                         | -6.757            | 0.1268   | No                 | ns             | -169.6 to 156.1       |
| <b>SOD3 vs Iron</b>                          | -88.03            | 1.652    | No                 | ns             | -250.9 to 74.84       |
| <b>SOD3 vs ZINC</b>                          | -263.8            | 4.953    | Yes                | ***            | -426.7 to -101.0      |
| <b>SOD3 vs CRP</b>                           | -49.35            | 0.9264   | No                 | ns             | -212.2 to 113.5       |
| <b>SOD3 vs Ferritin</b>                      | -309.0            | 5.801    | Yes                | ***            | -471.9 to -146.1      |
| <b>GSTp1 vs Iron</b>                         | -81.27            | 1.526    | No                 | ns             | -244.1 to 81.59       |
| <b>GSTp1 vs ZINC</b>                         | -257.1            | 4.826    | Yes                | ***            | -419.9 to -94.22      |
| <b>GSTp1 vs CRP</b>                          | -42.59            | 0.7995   | No                 | ns             | -205.5 to 120.3       |
| <b>GSTp1 vs Ferritin</b>                     | -302.2            | 5.674    | Yes                | ***            | -465.1 to -139.4      |

Abbreviations: SOD3- Super oxide dismutase, GSTp1- Glutathione s transferase, CRP- C-Reactive Protein.

**Table S2: Column statistics and One-way ANOVA analysis of Diabetes and Hypertension as co-morbidity Vs anti oxidant and anti inflammatory parameters**

|                      | <b>GSTp1</b> | <b>Iron</b> | <b>Zinc</b> | <b>CRP</b> | <b>Ferritin</b> | <b>SOD3</b> |
|----------------------|--------------|-------------|-------------|------------|-----------------|-------------|
| <b>No. of values</b> | 39           | 39          | 39          | 39         | 39              | 39          |
| <b>Minimum</b>       | 0.9130       | 13.00       | 236.4       | 3.500      | 7.900           | 0.5640      |
| <b>Maximum</b>       | 10.00        | 96.00       | 338.0       | 199.0      | 1300            | 8.230       |
| <b>Mean</b>          | 7.059        | 48.15       | 270.2       | 33.58      | 287.0           | 4.149       |
| <b>SD</b>            | 2.302        | 21.50       | 20.81       | 47.13      | 314.9           | 2.401       |
| <b>Std. Error</b>    | 0.3685       | 3.443       | 3.333       | 7.546      | 50.43           | 0.3844      |

| <b>Bonferroni's Multiple Comparison Test</b> | <b>Mean Diff.</b> | <b>t</b> | <b>P &lt; 0.05</b> | <b>Summary</b> | <b>95% CI of diff</b> |
|----------------------------------------------|-------------------|----------|--------------------|----------------|-----------------------|
| <b>GSTp1 vs SOD3</b>                         | 5.754             | 0.08243  | No                 | ns             | -202.1 to 213.6       |
| <b>GSTp1 vs Iron</b>                         | -50.77            | 0.7273   | No                 | ns             | -258.6 to 157.1       |
| <b>GSTp1 vs ZINC</b>                         | -266.4            | 3.816    | Yes                | **             | -474.3 to -58.54      |
| <b>GSTp1 vs CRP</b>                          | -93.86            | 1.345    | No                 | ns             | -301.7 to 114.0       |
| <b>GSTp1 vs Ferritin</b>                     | -528.9            | 7.576    | Yes                | ***            | -736.7 to -321.0      |
| <b>SOD3 vs Iron</b>                          | -56.52            | 0.8097   | No                 | ns             | -264.4 to 151.3       |
| <b>SOD3 vs ZINC</b>                          | -272.2            | 3.899    | Yes                | **             | -480.0 to -64.29      |
| <b>SOD3 vs CRP</b>                           | -99.61            | 1.427    | No                 | ns             | -307.5 to 108.3       |
| <b>SOD3 vs Ferritin</b>                      | -534.6            | 7.659    | Yes                | ***            | -742.5 to -326.8      |

Abbreviations: SOD3- Super oxide dismutase, GSTp1- Glutathione s transferase, CRP- C-Reactive Protein, SD-Standard deviation

**Table S3: Column statistics and One-way ANOVA analysis No co-morbidity vs anti oxidant and anti inflammatory parameters**

|                             | <b>DM</b> | <b>NC</b> | <b>DM-HT</b> |
|-----------------------------|-----------|-----------|--------------|
| <b>Number of values</b>     | 29        | 39        | 12           |
| <b>Minimum</b>              | 0.0810    | 0.5640    | 0.0640       |
| <b>Maximum</b>              | 5.550     | 8.230     | 2.630        |
| <b>Mean</b>                 | 1.994     | 4.149     | 0.9612       |
| <b>Std. Deviation</b>       | 1.590     | 2.401     | 0.7878       |
| <b>Std. Error</b>           | 0.2953    | 0.3844    | 0.2274       |
| <b>Lower 95% CI of mean</b> | 1.389     | 3.371     | 0.4606       |
| <b>Upper 95% CI of mean</b> | 2.599     | 4.927     | 1.462        |

| <b>Bonferroni's Multiple Comparison Test</b> | <b>Mean Diff.</b> | <b>t</b> | <b>P &lt; 0.05</b> | <b>Summary</b> | <b>95% CI of diff</b> |
|----------------------------------------------|-------------------|----------|--------------------|----------------|-----------------------|
| DM vs NC                                     | -2.155            | 4.478    | Yes                | ***            | -3.333 to -0.9773     |
| DM vs DM/Ht                                  | 1.033             | 1.533    | No                 | ns             | -0.6164 to 2.682      |
| NC vs DM/Ht                                  | 3.188             | 4.920    | Yes                | ***            | 1.602 to 4.774        |

Abbreviations: DM-Diabetes, NC-No co-morbidities, HT- hypertension

**Table S4: SOD3 levels in co-morbidities DM, NC, DM/HT**

| <b>Bonferroni's Multiple<br/>Comparison Test</b> | <b>Mean Diff.</b> | <b>t</b> | <b>P &lt; 0.05</b> | <b>Summary</b> | <b>95% CI of diff</b> |
|--------------------------------------------------|-------------------|----------|--------------------|----------------|-----------------------|
| DM/HT vs NC                                      | 0.7698            | 1.090    | No                 | ns             | -0.9580 to 2.498      |
| DM/HT vs DM                                      | 0.08069           | 0.1099   | No                 | ns             | -1.716 to 1.877       |
| NC vs DM                                         | -0.6891           | 1.314    | No                 | ns             | -1.972 to 0.5943      |

Abbreviations: DM-Diabetes, NC-No co-morbidities, HT- hypertension

**Table S5: GSTp1 levels in co-morbidities DM, DM-HT and NC**
